# Supplementary material for: Design and fabrication of wearable electronic textiles using twisted fiber-based threads
Source: Springer Nature journal article supplement (doi:10.1038/s41596-024-00956-6), 2024-03-01

## Reporting Summary

Nature Portfolio wishes to improve the reproducibility of the work that we publish. This form provides structure for consistency and transparency in reporting. For further information on Nature Portfolio policies, see our [Editorial Policies](#) and the [Editorial Policy Checklist](#).

Please do not complete any field with "not applicable" or n/a. Refer to the help text for what text to use if an item is not relevant to your study.

For final submission: please carefully check your responses for accuracy; you will not be able to make changes later.

### Statistics

For all statistical analyses, confirm that the following items are present in the figure legend, table legend, main text, or Methods section.

- |     |           |
|-----|-----------|
| n/a | Confirmed |
|-----|-----------|
- The exact sample size ( $n$ ) for each experimental group/condition, given as a discrete number and unit of measurement
  - A statement on whether measurements were taken from distinct samples or whether the same sample was measured repeatedly
  - The statistical test(s) used AND whether they are one- or two-sided  
*Only common tests should be described solely by name; describe more complex techniques in the Methods section.*
  - A description of all covariates tested
  - A description of any assumptions or corrections, such as tests of normality and adjustment for multiple comparisons
  - 
  - A full description of the statistical parameters including central tendency (e.g. means) or other basic estimates (e.g. regression coefficient) AND variation (e.g. standard deviation) or associated estimates of uncertainty (e.g. confidence intervals)
    - For null hypothesis testing, the test statistic (e.g.  $F$ ,  $t$ ,  $r$ ) with confidence intervals, effect sizes, degrees of freedom and  $P$  value noted  
*Give  $P$  values as exact values whenever suitable.*
    - For Bayesian analysis, information on the choice of priors and Markov chain Monte Carlo settings
    - For hierarchical and complex designs, identification of the appropriate level for tests and full reporting of outcomes
    - Estimates of effect sizes (e.g. Cohen's  $d$ , Pearson's  $r$ ), indicating how they were calculated
- Our web collection on [statistics for biologists](#) contains articles on many of the points above.*

### Software and code

Policy information about [availability of computer code](#)

|                 |                                                                                                                                        |
|-----------------|----------------------------------------------------------------------------------------------------------------------------------------|
| Data collection | Specific data of electronic threads were collected by LANDMon V7 (Wuhan LAND Electronic Co., Ltd.), CHI660E (CH Instruments, Inc.) and |
| Data analysis   | The data analysis was conducted using Microsoft Excel 2016 and represented using Origin 2023b.                                         |

For manuscripts utilizing custom algorithms or software that are central to the research but not yet described in published literature, software must be made available to editors and reviewers. We strongly encourage code deposition in a community repository (e.g. GitHub). See the Nature Portfolio [guidelines for submitting code & software](#) for further information.

### Data

Policy information about [availability of data](#)

All manuscripts must include a [data availability statement](#). This statement should provide the following information, where applicable:

- Accession codes, unique identifiers, or web links for publicly available datasets
- A description of any restrictions on data availability
- For clinical datasets or third party data, please ensure that the statement adheres to our [policy](#)

All data supporting the findings of this study are available from figshare at [https://figshare.com/articles/dataset/Source\\_data\\_Textile\\_system\\_zip/24511552](https://figshare.com/articles/dataset/Source_data_Textile_system_zip/24511552) and the supporting primary research papers (ref. 20, ref. 37, ref. 38 and ref. 44)

The source data of supporting primary research ref. 20 (<https://doi.org/10.1038/s41586-021-03772-0>) and ref. 44 (<https://doi.org/10.1038/s41586-021-03295-8>) are available at [https://figshare.com/articles/online\\_resource/Source\\_data\\_FLIBs/14775900](https://figshare.com/articles/online_resource/Source_data_FLIBs/14775900) and [https://figshare.com/articles/dataset/Source\\_data\\_Display\\_textile\\_rar/13573205](https://figshare.com/articles/dataset/Source_data_Display_textile_rar/13573205), respectively.

The source data of supporting primary research ref. 37 (<https://doi.org/10.1038/s41551-019-0462-8>) and ref. 38 (<https://doi.org/10.1038/nphoton.2015.37>) are available for research purposes from the corresponding authors upon reasonable request.

## Human research participants

Policy information about [studies involving human research participants](#) and [Sex and Gender in Research](#).

|                             |                      |
|-----------------------------|----------------------|
| Reporting on sex and gender | <input type="text"/> |
| Population characteristics  | <input type="text"/> |
| Recruitment                 | <input type="text"/> |
| Ethics oversight            | <input type="text"/> |

Note that full information on the approval of the study protocol must also be provided in the manuscript.

## Field-specific reporting

Please select the one below that is the best fit for your research. If you are not sure, read the appropriate sections before making your selection.

Life sciences       Behavioural & social sciences       Ecological, evolutionary & environmental sciences

## Life sciences study design

All studies must disclose on these points even when the disclosure is negative.

|                 |                      |
|-----------------|----------------------|
| Sample size     | <input type="text"/> |
| Data exclusions | <input type="text"/> |
| Replication     | <input type="text"/> |
| Randomization   | <input type="text"/> |
| Blinding        | <input type="text"/> |

## Behavioural & social sciences study design

All studies must disclose on these points even when the disclosure is negative.

|                   |                      |
|-------------------|----------------------|
| Study description | <input type="text"/> |
| Research sample   | <input type="text"/> |
| Sampling strategy | <input type="text"/> |
| Data collection   | <input type="text"/> |
| Timing            | <input type="text"/> |
| Data exclusions   | <input type="text"/> |
| Non-participation | <input type="text"/> |
| Randomization     | <input type="text"/> |

## Ecological, evolutionary & environmental sciences study design

All studies must disclose on these points even when the disclosure is negative.

|                   |                                                                                                                                                            |
|-------------------|------------------------------------------------------------------------------------------------------------------------------------------------------------|
| Study description | In this protocol, we describe the process of fabricating functional electronic threads using a twisting technique and then assembling <input type="text"/> |
| Research sample   | Thread lithium-ion batteries, thread electrochemical sensors, thread electroluminescent devices, assembly textile systems <input type="text"/>             |
| Sampling strategy | Sample sizes are provided in the figure legends for each experiment. The reasonable sample sizes are chosen to ensure they are big <input type="text"/>    |

|                          |                                                                                                     |
|--------------------------|-----------------------------------------------------------------------------------------------------|
| Data collection          | The data are collected by specialized software provided by the suppliers of scientific instruments. |
| Timing and soatial scale | NA                                                                                                  |
| Data exclusions          | No data were excluded from the experiments.                                                         |
| Reproducibility          | The protocol is based on experiences from many different published research studies.                |
| Randomization            | All the samples are randomly selected.                                                              |
| Blinding                 | Blinding was not performed, because there was no subjective test in this protocol.                  |

Did the study involve field work?  Yes  No

## Field work, collection and transport

|                        |  |
|------------------------|--|
| Field conditions       |  |
| Location               |  |
| Access & import/export |  |
| Disturbance            |  |

## Reporting for specific materials, systems and methods

We require information from authors about some types of materials, experimental systems and methods used in many studies. Here, indicate whether each material, system or method listed is relevant to your study. If you are not sure if a list item applies to your research, read the appropriate section before selecting a response.

| Materials & experimental systems |                               | Methods                          |                        |
|----------------------------------|-------------------------------|----------------------------------|------------------------|
| n/a                              | Involved in the study         | n/a                              | Involved in the study  |
| <input type="radio"/>            | Antibodies                    | <input checked="" type="radio"/> | ChIP-seq               |
| <input type="radio"/>            | Eukaryotic cell lines         | <input type="radio"/>            | Flow cytometry         |
| <input type="radio"/>            | Palaeontology and archaeology | <input checked="" type="radio"/> | MRI-based neuroimaging |
| <input type="radio"/>            | Animals and other organisms   |                                  |                        |
| <input type="radio"/>            | Clinical data                 |                                  |                        |
| <input type="radio"/>            | Dual use research of concern  |                                  |                        |

### Antibodies

|                 |  |
|-----------------|--|
| Antibodies used |  |
| Validation      |  |

### Eukaryotic cell lines

Policy information about [cell lines](#) and [Sex and Gender in Research](#)

|                                                                      |  |
|----------------------------------------------------------------------|--|
| Cell line source(s)                                                  |  |
| Authentication                                                       |  |
| Mycoplasma contamination                                             |  |
| Commonly misidentified lines<br>(See <a href="#">ICLAC</a> register) |  |

### Palaeontology and Archaeology

|                                                                                                                                                 |  |
|-------------------------------------------------------------------------------------------------------------------------------------------------|--|
| Specimen provenance                                                                                                                             |  |
| Specimen deposition                                                                                                                             |  |
| Dating methods                                                                                                                                  |  |
| <input type="checkbox"/> Tick this box to confirm that the raw and calibrated dates are available in the paper or in Supplementary Information. |  |
| Ethics oversight                                                                                                                                |  |

Note that full information on the approval of the study protocol must also be provided in the manuscript.

## Animals and other research organisms

Policy information about [studies involving animals](#); [ARRIVE guidelines](#) recommended for reporting animal research, and [Sex and Gender in Research](#)

|                         |                      |
|-------------------------|----------------------|
| Laboratory animals      | <input type="text"/> |
| Wild animals            | <input type="text"/> |
| Reporting on sex        | <input type="text"/> |
| Field-collected samples | <input type="text"/> |
| Ethics oversight        | <input type="text"/> |

Note that full information on the approval of the study protocol must also be provided in the manuscript.

## Clinical data

Policy information about [clinical studies](#)

All manuscripts should comply with the [ICMJE guidelines for publication of clinical research](#) and a completed [CONSORT checklist](#) must be included with all submissions.

|                             |                      |
|-----------------------------|----------------------|
| Clinical trial registration | <input type="text"/> |
| Study protocol              | <input type="text"/> |
| Data collection             | <input type="text"/> |
| Outcomes                    | <input type="text"/> |

## Dual use research of concern

Policy information about [dual use research of concern](#)

### Hazards

Could the accidental, deliberate or reckless misuse of agents or technologies generated in the work, or the application of information presented in the manuscript, pose a threat to:

| No                    | Yes                   |
|-----------------------|-----------------------|
| <input type="radio"/> | <input type="radio"/> |

### Experiments of concern

Does the work involve any of these experiments of concern:

| No                    | Yes                   |
|-----------------------|-----------------------|
| <input type="radio"/> | <input type="radio"/> |

## ChIP-seq

### Data deposition

- Confirm that both raw and final processed data have been deposited in a public database such as [GEO](#).
- Confirm that you have deposited or provided access to graph files (e.g. BED files) for the called peaks.

Data access links

*May remain private before publication*

Files in database submission

Genome browser session

(e.g. [UCSC](#))

## Methodology

Replicates

Sequencing depth

Antibodies

Peak calling parameters

Data quality

Software

## Flow Cytometry

### Plots

Confirm that:

- The axis labels state the marker and fluorochrome used (e.g. CD4-FITC).
- The axis scales are clearly visible. Include numbers along axes only for bottom left plot of group (a 'group' is an analysis of identical markers).
- All plots are contour plots with outliers or pseudocolor plots.
- A numerical value for number of cells or percentage (with statistics) is provided.

### Methodology

Sample preparation

Instrument

Software

Cell population abundance

Gating strategy

 Tick this box to confirm that a figure exemplifying the gating strategy is provided in the Supplementary Information.

## Magnetic resonance imaging

### Experimental design

Design type

Design specifications

Behavioral performance measures

### Acquisition

Imaging type(s)

Field strength

Sequence &amp; imaging parameters

Area of acquisition

Diffusion MRI

 Used Not used

### Preprocessing

Preprocessing software

Normalization

Normalization template

Noise and artifact removal

Volume censoring

### Statistical modeling & inference

Model type and settings

Effect(s) tested

Specify type of analysis:  Whole brain  ROI-based  Both

Statistic type for inference   
 (See [Eklund et al. 2016](#) )

Correction

**Models & analysis**

|                                  |                                               |                      |
|----------------------------------|-----------------------------------------------|----------------------|
| n/a                              | Involvement in the study                      |                      |
| <input checked="" type="radio"/> | Functional and/or effective connectivity      | <input type="text"/> |
| <input checked="" type="radio"/> | Graph analysis                                | <input type="text"/> |
| <input checked="" type="radio"/> | Multivariate modeling or predictive analysis  | <input type="text"/> |
|                                  | Functional and/or effective connectivity      | <input type="text"/> |
|                                  | Graph analysis                                | <input type="text"/> |
|                                  | Multivariate modeling and predictive analysis | <input type="text"/> |

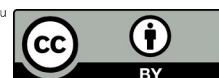

Supplement: MOESM2 [file 41596_2024_956_MOESM2_ESM14.pdf]
