# Supplementary material for: Design and fabrication of wearable electronic textiles using twisted fiber-based threads
Source: Springer Nature journal article supplement (doi:10.1038/s41596-024-00956-6), 2024-03-01
Supplement: MOESM1 [file 41596_2024_956_MOESM1_ESM13.pdf]

# Design and fabrication of wearable electronic textiles using twisted fiber-based threads

In the format provided by the authors and unedited

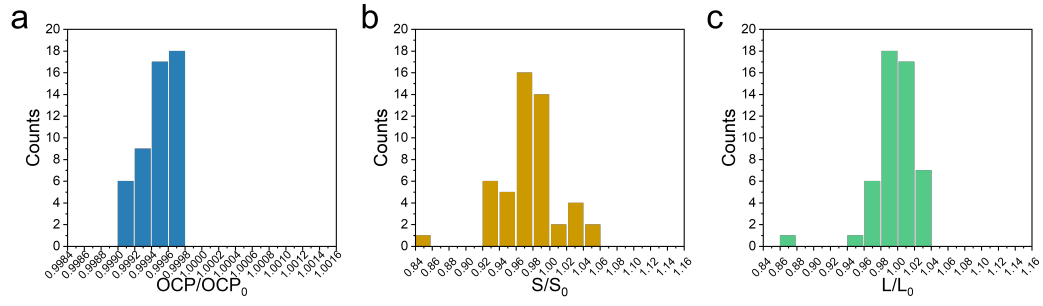

**Supplementary Fig. 1 Performance variations of electronic threads before and after sewing. a,** Statistical distribution of open-circuit voltage changes of 50 TLIBs. **b,** Statistical distribution of sensitivity changes of calcium ion sensors in 50 MSTs before and after sewing. **c,** Statistical distribution of luminance changes of 50 TELDs before and after sewing.

## **Caption for Supplementary Video**

**Supplementary Video 1** | Operation of textile system for sweat monitoring
